# Supplementary material for: A Nuclear Magnetic Resonance (NMR)- and Mass Spectrometry (MS)-Based Saturation Kinetics Model of a Bryophyllum pinnatum Decoction as a Treatment for Kidney Stones
Source: MDPI journal article supplement (doi:10.3390/ijms25105280), 2024-05-12
Supplement: s1 [file s1]

**Supplementary Figures:**

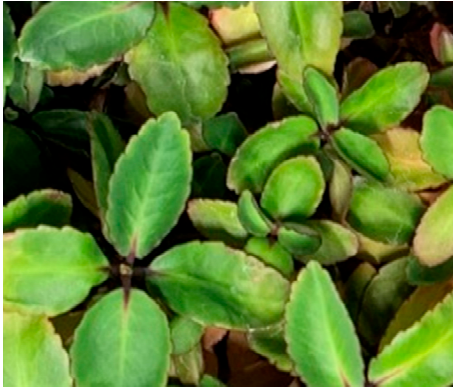

**Figure S1.** *Bryophyllum pinnatum* plant growing indoor at the Faculty of Agricultural and Environmental Sciences, McDonald Campus, McGill University.
